# Supplementary material for: Investigation of Electron Transport Material-Free Perovskite/CIGS Tandem Solar Cell
Source: MDPI journal article supplement (doi:10.3390/en15176326), 2022-08-30
Supplement: s1 [file s1]

**Table S1.** Physical parameters of the incident, transmitted spectrum definitions, and their units.

| Symbol         | Definition                                                                                       | Unit                                 |
|----------------|--------------------------------------------------------------------------------------------------|--------------------------------------|
| $S(\lambda)$   | The power density of the light spectrum transmitted from the top sub-cell to the bottom sub-cell | W/m <sup>2</sup>                     |
| $S_o(\lambda)$ | The incident spectrum is AM 1.5                                                                  |                                      |
| $x$            | The layer number                                                                                 |                                      |
| $n$            | The total number of layers of the sub-cell                                                       |                                      |
| $\alpha$       | The absorption coefficient                                                                       | cm <sup>-1</sup>                     |
| $d$            | The thickness of each layer                                                                      | cm                                   |
| $A_\alpha$     | A pre-factor of 10 <sup>5</sup>                                                                  | cm <sup>-1</sup> .eV <sup>-1/2</sup> |
| $h$            | The Plancks constant                                                                             | eV.sec                               |
| $\nu$          | The spectrum frequency                                                                           | Hz                                   |
| $E_g$          | The energy gap of the material                                                                   | eV                                   |

**Table S2.** Parameters of defect interfaces [33,34,71].

| Parameters                                                        | ETL/absorber layer/HTL |
|-------------------------------------------------------------------|------------------------|
| Defect type                                                       | neutral                |
| Electron and hole capture cross-section (cm <sup>2</sup> )        | 1E-15                  |
| Total density (integrated over all energies) (1/cm <sup>2</sup> ) | 1E10                   |
| Reference for defect energy level $E_t$                           | Above Highest $E_v$    |
| Energetic distribution                                            | Single                 |
| Characteristic energy (eV)                                        | 0.1                    |
| Energy level with concerning Reference (eV)                       | 0.6                    |

**Table S3.** Comparison of experimental PSC data [27], and simulations utilizing SCAPS-1D with different perovskite thicknesses.

| Absorber   | Perovskite thickness (nm) | Type         | PCE (%) | $J_{sc}$ (mA/cm <sup>2</sup> ) | $V_{oc}$ (V) | FF (%) |
|------------|---------------------------|--------------|---------|--------------------------------|--------------|--------|
| Perovskite | 300                       | experimental | 16.22   | 20.68                          | 1.09         | 72.00  |
|            |                           | Simulation   | 16.22   | 20.60                          | 1.09         | 72.12  |
|            | 400                       | experimental | 18.12   | 23.02                          | 1.09         | 72.21  |
|            |                           | Simulation   | 18.11   | 22.95                          | 1.09         | 72.33  |
|            | 500                       | experimental | 16.77   | 23.64                          | 1.09         | 65.08  |
|            |                           | Simulation   | 16.71   | 23.65                          | 1.09         | 65.08  |
